# Supplementary material
Source: PubMed Central journal article supplement (PMC1987361)
Supplement: NIHMS25408-supplement-01.pdf [file NIHMS25408-supplement-01.pdf]

|    | 1                                                                                                                                                       | 2                                                                                                                                                      | 3                                                                                                                                                       | 4                                                                                                                                                       | 5                                                                                                                                                         | 6                                                                                                                                                        | 7                                                                                                                                                        |
|----|---------------------------------------------------------------------------------------------------------------------------------------------------------|--------------------------------------------------------------------------------------------------------------------------------------------------------|---------------------------------------------------------------------------------------------------------------------------------------------------------|---------------------------------------------------------------------------------------------------------------------------------------------------------|-----------------------------------------------------------------------------------------------------------------------------------------------------------|----------------------------------------------------------------------------------------------------------------------------------------------------------|----------------------------------------------------------------------------------------------------------------------------------------------------------|
| 0  | 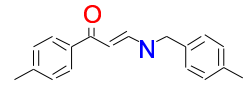 <p>Caco_2 8.30<br/>ID 6675993<br/>MDCK 74.72<br/>Score -60.12</p>     |  <p>Caco_2 8.59<br/>ID 6686687<br/>MDCK 125.61<br/>Score -58.66</p>   |  <p>Caco_2 8.60<br/>ID 6691911<br/>MDCK 197.20<br/>Score -58.34</p>    |  <p>Caco_2 8.55<br/>ID 6691798<br/>MDCK 107.26<br/>Score -57.29</p>   |  <p>Caco_2 8.41<br/>ID 5267814<br/>MDCK 105.52<br/>Score -56.83</p>    |  <p>Caco_2 18.89<br/>ID 5257957<br/>MDCK 82.99<br/>Score -56.50</p>   |  <p>Caco_2 21.01<br/>ID 7177875<br/>MDCK 90.46<br/>Score -56.24</p>   |
| 7  |  <p>Caco_2 10.61<br/>ID 6873512<br/>MDCK 515.32<br/>Score -56.18</p>   |  <p>Caco_2 11.08<br/>ID 5163413<br/>MDCK 204.09<br/>Score -55.62</p>  |  <p>Caco_2 10.94<br/>ID 5929667<br/>MDCK 268.98<br/>Score -55.58</p>   |  <p>Caco_2 9.05<br/>ID 5986065<br/>MDCK 105.94<br/>Score -55.40</p>   |  <p>Caco_2 14.83<br/>ID 6368985<br/>MDCK 127.46<br/>Score -54.86</p>   |  <p>Caco_2 22.61<br/>ID 6851138<br/>MDCK 117.99<br/>Score -54.71</p>  |  <p>Caco_2 8.25<br/>ID 7820253<br/>MDCK 121.79<br/>Score -54.48</p>   |
| 14 |  <p>Caco_2 7.46<br/>ID 5928584<br/>MDCK 54.45<br/>Score -54.31</p>     |  <p>Caco_2 24.46<br/>ID 5891358<br/>MDCK 375.43<br/>Score -54.19</p>  |  <p>Caco_2 14.02<br/>ID 7627410<br/>MDCK 204.96<br/>Score -54.14</p>   |  <p>Caco_2 23.38<br/>ID 6325878<br/>MDCK 169.60<br/>Score -53.99</p>  |  <p>Caco_2 8.99<br/>ID 5217954<br/>MDCK 145.96<br/>Score -53.91</p>    |  <p>Caco_2 18.61<br/>ID 5838177<br/>MDCK 217.59<br/>Score -53.88</p>  |  <p>Caco_2 9.98<br/>ID 6836418<br/>MDCK 258.23<br/>Score -53.85</p>   |
| 21 |  <p>Caco_2 13.34<br/>ID 7527426<br/>MDCK 260.86<br/>Score -53.68</p> |  <p>Caco_2 10.47<br/>ID 7505177<br/>MDCK 94.11<br/>Score -53.68</p> |  <p>Caco_2 10.13<br/>ID 6368455<br/>MDCK 283.50<br/>Score -53.64</p> |  <p>Caco_2 7.73<br/>ID 6831945<br/>MDCK 313.44<br/>Score -53.59</p> |  <p>Caco_2 19.17<br/>ID 7235858<br/>MDCK 221.32<br/>Score -53.56</p> |  <p>Caco_2 8.73<br/>ID 6815768<br/>MDCK 393.68<br/>Score -53.47</p> |  <p>Caco_2 12.84<br/>ID 5743352<br/>MDCK 94.71<br/>Score -53.29</p> |

|    | 1                                                                                                                                                       | 2                                                                                                                                                     | 3                                                                                                                                                      | 4                                                                                                                                                        | 5                                                                                                                                                        | 6                                                                                                                                                         | 7                                                                                                                                                         |
|----|---------------------------------------------------------------------------------------------------------------------------------------------------------|-------------------------------------------------------------------------------------------------------------------------------------------------------|--------------------------------------------------------------------------------------------------------------------------------------------------------|----------------------------------------------------------------------------------------------------------------------------------------------------------|----------------------------------------------------------------------------------------------------------------------------------------------------------|-----------------------------------------------------------------------------------------------------------------------------------------------------------|-----------------------------------------------------------------------------------------------------------------------------------------------------------|
| 28 | 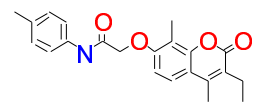 <p>Caco_2 9.24<br/>ID 7813271<br/>MDCK 223.02<br/>Score -53.27</p>    |  <p>Caco_2 10.11<br/>ID 5276532<br/>MDCK 691.63<br/>Score -53.22</p> |  <p>Caco_2 10.10<br/>ID 6847361<br/>MDCK 665.34<br/>Score -53.19</p>  |  <p>Caco_2 21.67<br/>ID 6134282<br/>MDCK 54.05<br/>Score -53.18</p>    |  <p>Caco_2 11.41<br/>ID 6523447<br/>MDCK 331.08<br/>Score -53.04</p>  |  <p>Caco_2 24.44<br/>ID 6834789<br/>MDCK 208.63<br/>Score -53.03</p>   |  <p>Caco_2 22.32<br/>ID 7775090<br/>MDCK 159.28<br/>Score -52.93</p>   |
| 35 |  <p>Caco_2 20.77<br/>ID 7226512<br/>MDCK 162.68<br/>Score -52.89</p>   |  <p>Caco_2 12.22<br/>ID 5985919<br/>MDCK 111.17<br/>Score -52.88</p> |  <p>Caco_2 16.23<br/>ID 6371083<br/>MDCK 301.82<br/>Score -52.86</p>  |  <p>Caco_2 17.25<br/>ID 5938350<br/>MDCK 125.49<br/>Score -52.82</p>   |  <p>Caco_2 24.49<br/>ID 7429532<br/>MDCK 438.28<br/>Score -52.82</p>  |  <p>Caco_2 12.11<br/>ID 6555133<br/>MDCK 136.23<br/>Score -52.80</p>   |  <p>Caco_2 14.94<br/>ID 5130204<br/>MDCK 50.67<br/>Score -52.78</p>    |
| 42 |  <p>Caco_2 17.15<br/>ID 6235051<br/>MDCK 200.26<br/>Score -52.74</p>   |  <p>Caco_2 10.88<br/>ID 7304779<br/>MDCK 209.65<br/>Score -52.68</p> |  <p>Caco_2 19.59<br/>ID 6944792<br/>MDCK 142.15<br/>Score -52.65</p> |  <p>Caco_2 23.99<br/>ID 5600341<br/>MDCK 377.35<br/>Score -52.64</p>   |  <p>Caco_2 7.71<br/>ID 5647250<br/>MDCK 131.72<br/>Score -52.63</p>  |  <p>Caco_2 10.56<br/>ID 5772619<br/>MDCK 191.44<br/>Score -52.62</p>   |  <p>Caco_2 12.33<br/>ID 5677402<br/>MDCK 133.70<br/>Score -52.58</p>   |
| 49 |  <p>Caco_2 20.52<br/>ID 5214879<br/>MDCK 270.58<br/>Score -52.55</p> |  <p>Caco_2 7.22<br/>ID 6893773<br/>MDCK 50.43<br/>Score -52.49</p> |  <p>Caco_2 7.22<br/>ID 5989615<br/>MDCK 97.56<br/>Score -52.49</p>  |  <p>Caco_2 14.87<br/>ID 7729926<br/>MDCK 411.88<br/>Score -52.45</p> |  <p>Caco_2 10.42<br/>ID 7608088<br/>MDCK 83.65<br/>Score -52.44</p> |  <p>Caco_2 14.69<br/>ID 7491470<br/>MDCK 257.39<br/>Score -52.42</p> |  <p>Caco_2 15.13<br/>ID 6672968<br/>MDCK 223.57<br/>Score -52.34</p> |

|    | 1                                                                                                                                                       | 2                                                                                                                                                       | 3                                                                                                                                                       | 4                                                                                                                                                       | 5                                                                                                                                                         | 6                                                                                                                                                         | 7                                                                                                                                                        |
|----|---------------------------------------------------------------------------------------------------------------------------------------------------------|---------------------------------------------------------------------------------------------------------------------------------------------------------|---------------------------------------------------------------------------------------------------------------------------------------------------------|---------------------------------------------------------------------------------------------------------------------------------------------------------|-----------------------------------------------------------------------------------------------------------------------------------------------------------|-----------------------------------------------------------------------------------------------------------------------------------------------------------|----------------------------------------------------------------------------------------------------------------------------------------------------------|
| 56 | 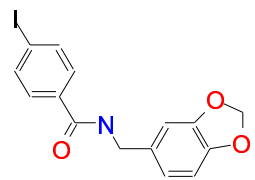 <p>Caco_2 19.76<br/>ID 5926815<br/>MDCK 263.83<br/>Score -52.32</p>   |  <p>Caco_2 17.50<br/>ID 5221057<br/>MDCK 76.53<br/>Score -52.26</p>    |  <p>Caco_2 14.13<br/>ID 7538053<br/>MDCK 367.12<br/>Score -52.23</p>   |  <p>Caco_2 15.06<br/>ID 6873660<br/>MDCK 63.80<br/>Score -52.23</p>   |  <p>Caco_2 24.82<br/>ID 5302316<br/>MDCK 148.63<br/>Score -52.22</p>   |  <p>Caco_2 20.55<br/>ID 7035224<br/>MDCK 281.38<br/>Score -52.22</p>   |  <p>Caco_2 15.19<br/>ID 6828862<br/>MDCK 292.88<br/>Score -52.22</p>  |
| 63 |  <p>Caco_2 20.47<br/>ID 5404514<br/>MDCK 115.30<br/>Score -52.22</p>   |  <p>Caco_2 7.21<br/>ID 7464130<br/>MDCK 236.44<br/>Score -52.17</p>    |  <p>Caco_2 21.60<br/>ID 5281591<br/>MDCK 679.71<br/>Score -52.16</p>   |  <p>Caco_2 20.53<br/>ID 7315913<br/>MDCK 53.35<br/>Score -52.13</p>   |  <p>Caco_2 17.26<br/>ID 6613327<br/>MDCK 112.92<br/>Score -52.10</p>   |  <p>Caco_2 13.90<br/>ID 6872987<br/>MDCK 79.87<br/>Score -52.08</p>    |  <p>Caco_2 14.10<br/>ID 7663315<br/>MDCK 317.29<br/>Score -52.07</p>  |
| 70 |  <p>Caco_2 8.18<br/>ID 6831907<br/>MDCK 375.34<br/>Score -52.02</p>   |  <p>Caco_2 21.53<br/>ID 5101450<br/>MDCK 268.03<br/>Score -52.01</p>  |  <p>Caco_2 16.05<br/>ID 5632931<br/>MDCK 278.62<br/>Score -52.01</p>  |  <p>Caco_2 9.98<br/>ID 7683553<br/>MDCK 266.04<br/>Score -51.98</p>  |  <p>Caco_2 14.36<br/>ID 7328404<br/>MDCK 161.28<br/>Score -51.97</p>  |  <p>Caco_2 12.14<br/>ID 5771026<br/>MDCK 218.38<br/>Score -51.94</p>  |  <p>Caco_2 8.58<br/>ID 5305148<br/>MDCK 403.76<br/>Score -51.93</p>  |
| 77 |  <p>Caco_2 10.95<br/>ID 7533184<br/>MDCK 212.53<br/>Score -51.91</p> |  <p>Caco_2 25.13<br/>ID 7757775<br/>MDCK 243.11<br/>Score -51.88</p> |  <p>Caco_2 19.51<br/>ID 6168201<br/>MDCK 177.97<br/>Score -51.87</p> |  <p>Caco_2 10.90<br/>ID 6325228<br/>MDCK 87.74<br/>Score -51.86</p> |  <p>Caco_2 20.33<br/>ID 5940746<br/>MDCK 220.94<br/>Score -51.84</p> |  <p>Caco_2 19.68<br/>ID 7276073<br/>MDCK 206.99<br/>Score -51.82</p> |  <p>Caco_2 20.42<br/>ID 5163631<br/>MDCK 73.74<br/>Score -51.82</p> |

|     | 1                                                                                                                                                      | 2                                                                                                                                                      | 3                                                                                                                                                      | 4                                                                                                                                                       | 5                                                                                                                                                         | 6                                                                                                                                                         | 7                                                                                                                                                        |
|-----|--------------------------------------------------------------------------------------------------------------------------------------------------------|--------------------------------------------------------------------------------------------------------------------------------------------------------|--------------------------------------------------------------------------------------------------------------------------------------------------------|---------------------------------------------------------------------------------------------------------------------------------------------------------|-----------------------------------------------------------------------------------------------------------------------------------------------------------|-----------------------------------------------------------------------------------------------------------------------------------------------------------|----------------------------------------------------------------------------------------------------------------------------------------------------------|
| 84  | 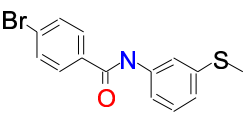 <p>Caco_2 18.19<br/>ID 7167574<br/>MDCK 179.11<br/>Score -51.81</p>  |  <p>Caco_2 13.44<br/>ID 5214406<br/>MDCK 155.50<br/>Score -51.79</p>  |  <p>Caco_2 13.05<br/>ID 6327343<br/>MDCK 121.69<br/>Score -51.79</p>  |  <p>Caco_2 7.90<br/>ID 6671761<br/>MDCK 157.63<br/>Score -51.77</p>   |  <p>Caco_2 8.86<br/>ID 5605642<br/>MDCK 162.21<br/>Score -51.76</p>    |  <p>Caco_2 10.09<br/>ID 7664902<br/>MDCK 200.92<br/>Score -51.75</p>   |  <p>Caco_2 27.89<br/>ID 5476155<br/>MDCK 188.82<br/>Score -51.74</p>  |
| 91  |  <p>Caco_2 12.24<br/>ID 5489881<br/>MDCK 120.19<br/>Score -51.70</p>  |  <p>Caco_2 28.02<br/>ID 5469436<br/>MDCK 315.28<br/>Score -51.69</p>  |  <p>Caco_2 18.51<br/>ID 5927013<br/>MDCK 146.10<br/>Score -51.69</p>  |  <p>Caco_2 25.44<br/>ID 5221636<br/>MDCK 287.67<br/>Score -51.68</p>  |  <p>Caco_2 14.59<br/>ID 5225709<br/>MDCK 92.07<br/>Score -51.68</p>    |  <p>Caco_2 10.99<br/>ID 7682275<br/>MDCK 113.18<br/>Score -51.67</p>   |  <p>Caco_2 19.12<br/>ID 7161094<br/>MDCK 97.06<br/>Score -51.64</p>   |
| 98  |  <p>Caco_2 18.40<br/>ID 5364615<br/>MDCK 81.98<br/>Score -51.63</p>   |  <p>Caco_2 20.67<br/>ID 5774505<br/>MDCK 431.59<br/>Score -51.60</p> |  <p>Caco_2 7.32<br/>ID 7754351<br/>MDCK 287.06<br/>Score -51.54</p>   |  <p>Caco_2 22.32<br/>ID 5362902<br/>MDCK 182.64<br/>Score -51.54</p> |  <p>Caco_2 21.64<br/>ID 7179559<br/>MDCK 460.70<br/>Score -51.54</p>   |  <p>Caco_2 10.73<br/>ID 7692317<br/>MDCK 187.28<br/>Score -51.52</p>   |  <p>Caco_2 19.04<br/>ID 5766114<br/>MDCK 414.35<br/>Score -51.51</p>  |
| 105 |  <p>Caco_2 9.35<br/>ID 6401523<br/>MDCK 227.21<br/>Score -51.51</p> |  <p>Caco_2 7.57<br/>ID 6120413<br/>MDCK 339.83<br/>Score -51.49</p> |  <p>Caco_2 13.35<br/>ID 7665904<br/>MDCK 53.41<br/>Score -51.48</p> |  <p>Caco_2 8.08<br/>ID 6992350<br/>MDCK 275.01<br/>Score -51.45</p> |  <p>Caco_2 19.36<br/>ID 6922749<br/>MDCK 494.58<br/>Score -51.41</p> |  <p>Caco_2 16.15<br/>ID 6616769<br/>MDCK 279.14<br/>Score -51.39</p> |  <p>Caco_2 8.23<br/>ID 5762097<br/>MDCK 395.72<br/>Score -51.39</p> |

|     | 1                                                                                                                                                       | 2                                                                                                                                                      | 3                                                                                                                                                      | 4                                                                                                                                                       | 5                                                                                                                                                         | 6                                                                                                                                                         | 7                                                                                                                                                         |
|-----|---------------------------------------------------------------------------------------------------------------------------------------------------------|--------------------------------------------------------------------------------------------------------------------------------------------------------|--------------------------------------------------------------------------------------------------------------------------------------------------------|---------------------------------------------------------------------------------------------------------------------------------------------------------|-----------------------------------------------------------------------------------------------------------------------------------------------------------|-----------------------------------------------------------------------------------------------------------------------------------------------------------|-----------------------------------------------------------------------------------------------------------------------------------------------------------|
| 112 | 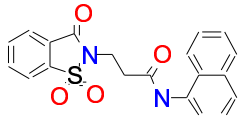 <p>Caco_2 18.97<br/>ID 7507377<br/>MDCK 349.53<br/>Score -51.38</p>   |  <p>Caco_2 20.25<br/>ID 5615809<br/>MDCK 69.12<br/>Score -51.38</p>   |  <p>Caco_2 22.37<br/>ID 6944194<br/>MDCK 82.33<br/>Score -51.37</p>   |  <p>Caco_2 25.72<br/>ID 5258223<br/>MDCK 57.14<br/>Score -51.35</p>   |  <p>Caco_2 16.19<br/>ID 6221563<br/>MDCK 185.86<br/>Score -51.32</p>   |  <p>Caco_2 15.41<br/>ID 5930088<br/>MDCK 237.33<br/>Score -51.32</p>   |  <p>Caco_2 10.96<br/>ID 7671066<br/>MDCK 250.79<br/>Score -51.28</p>   |
| 119 |  <p>Caco_2 10.15<br/>ID 6868888<br/>MDCK 449.42<br/>Score -51.27</p>   |  <p>Caco_2 18.60<br/>ID 7084973<br/>MDCK 216.25<br/>Score -51.24</p>  |  <p>Caco_2 9.41<br/>ID 5344752<br/>MDCK 171.50<br/>Score -51.23</p>   |  <p>Caco_2 15.45<br/>ID 5705280<br/>MDCK 467.63<br/>Score -51.23</p>  |  <p>Caco_2 8.19<br/>ID 7668400<br/>MDCK 344.11<br/>Score -51.22</p>    |  <p>Caco_2 12.34<br/>ID 7629600<br/>MDCK 247.94<br/>Score -51.20</p>   |  <p>Caco_2 24.71<br/>ID 5609859<br/>MDCK 374.86<br/>Score -51.19</p>   |
| 126 |  <p>Caco_2 10.13<br/>ID 6872051<br/>MDCK 269.62<br/>Score -51.19</p>   |  <p>Caco_2 9.37<br/>ID 7881766<br/>MDCK 287.96<br/>Score -51.18</p>   |  <p>Caco_2 19.24<br/>ID 7094769<br/>MDCK 275.58<br/>Score -51.15</p> |  <p>Caco_2 15.26<br/>ID 6366911<br/>MDCK 391.88<br/>Score -51.13</p>  |  <p>Caco_2 13.65<br/>ID 5214363<br/>MDCK 381.84<br/>Score -51.13</p>   |  <p>Caco_2 10.65<br/>ID 5210857<br/>MDCK 483.00<br/>Score -51.12</p>   |  <p>Caco_2 7.82<br/>ID 5217961<br/>MDCK 293.58<br/>Score -51.12</p>    |
| 133 |  <p>Caco_2 15.83<br/>ID 6514134<br/>MDCK 125.25<br/>Score -51.12</p> |  <p>Caco_2 7.00<br/>ID 5964423<br/>MDCK 234.31<br/>Score -51.11</p> |  <p>Caco_2 14.98<br/>ID 6566789<br/>MDCK 55.26<br/>Score -51.10</p> |  <p>Caco_2 8.86<br/>ID 5924322<br/>MDCK 215.76<br/>Score -51.09</p> |  <p>Caco_2 10.23<br/>ID 5345366<br/>MDCK 215.82<br/>Score -51.08</p> |  <p>Caco_2 14.58<br/>ID 5268632<br/>MDCK 146.69<br/>Score -51.08</p> |  <p>Caco_2 10.78<br/>ID 7568741<br/>MDCK 246.92<br/>Score -51.07</p> |

|     | 1                                                                                                                                                       | 2                                                                                                                                                       | 3                                                                                                                                                       | 4                                                                                                                                                       | 5                                                                                                                                                        | 6                                                                                                                                                         | 7                                                                                                                                                         |
|-----|---------------------------------------------------------------------------------------------------------------------------------------------------------|---------------------------------------------------------------------------------------------------------------------------------------------------------|---------------------------------------------------------------------------------------------------------------------------------------------------------|---------------------------------------------------------------------------------------------------------------------------------------------------------|----------------------------------------------------------------------------------------------------------------------------------------------------------|-----------------------------------------------------------------------------------------------------------------------------------------------------------|-----------------------------------------------------------------------------------------------------------------------------------------------------------|
| 140 | 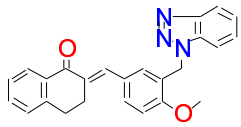 <p>Caco_2 10.58<br/>ID 6151759<br/>MDCK 151.70<br/>Score -51.06</p>   |  <p>Caco_2 17.69<br/>ID 5717110<br/>MDCK 397.77<br/>Score -51.05</p>   |  <p>Caco_2 11.46<br/>ID 6006830<br/>MDCK 413.22<br/>Score -51.04</p>   |  <p>Caco_2 12.18<br/>ID 6091221<br/>MDCK 230.44<br/>Score -51.02</p>  |  <p>Caco_2 27.61<br/>ID 5403900<br/>MDCK 53.01<br/>Score -51.02</p>   |  <p>Caco_2 8.81<br/>ID 5523126<br/>MDCK 229.80<br/>Score -51.02</p>    |  <p>Caco_2 29.59<br/>ID 5175382<br/>MDCK 89.00<br/>Score -51.01</p>    |
| 147 |  <p>Caco_2 19.57<br/>ID 5219429<br/>MDCK 223.29<br/>Score -51.00</p>   |  <p>Caco_2 21.28<br/>ID 5331500<br/>MDCK 146.62<br/>Score -50.98</p>   |  <p>Caco_2 11.81<br/>ID 7431064<br/>MDCK 80.95<br/>Score -50.98</p>    |  <p>Caco_2 23.37<br/>ID 5738737<br/>MDCK 196.52<br/>Score -50.97</p>  |  <p>Caco_2 15.57<br/>ID 6161484<br/>MDCK 234.65<br/>Score -50.97</p>  |  <p>Caco_2 18.73<br/>ID 7023104<br/>MDCK 185.33<br/>Score -50.97</p>   |  <p>Caco_2 13.53<br/>ID 6875566<br/>MDCK 57.08<br/>Score -50.94</p>    |
| 154 |  <p>Caco_2 7.62<br/>ID 7243250<br/>MDCK 215.30<br/>Score -50.92</p>   |  <p>Caco_2 11.82<br/>ID 5233829<br/>MDCK 271.99<br/>Score -50.87</p>   |  <p>Caco_2 16.88<br/>ID 5570248<br/>MDCK 141.56<br/>Score -50.87</p>  |  <p>Caco_2 23.64<br/>ID 6136307<br/>MDCK 332.92<br/>Score -50.86</p> |  <p>Caco_2 15.73<br/>ID 6039370<br/>MDCK 66.90<br/>Score -50.84</p>  |  <p>Caco_2 19.42<br/>ID 7449063<br/>MDCK 297.82<br/>Score -50.81</p>   |  <p>Caco_2 7.86<br/>ID 6672963<br/>MDCK 88.63<br/>Score -50.80</p>    |
| 161 |  <p>Caco_2 17.87<br/>ID 5210221<br/>MDCK 189.28<br/>Score -50.78</p> |  <p>Caco_2 18.85<br/>ID 5940799<br/>MDCK 441.65<br/>Score -50.78</p> |  <p>Caco_2 28.02<br/>ID 5971961<br/>MDCK 295.27<br/>Score -50.77</p> |  <p>Caco_2 17.82<br/>ID 7206528<br/>MDCK 91.38<br/>Score -50.76</p> |  <p>Caco_2 9.80<br/>ID 6842511<br/>MDCK 121.69<br/>Score -50.75</p> |  <p>Caco_2 17.87<br/>ID 5210216<br/>MDCK 173.29<br/>Score -50.75</p> |  <p>Caco_2 20.65<br/>ID 5787459<br/>MDCK 161.44<br/>Score -50.74</p> |

|     | 1                                                                                                                                                     | 2 | 3 | 4 | 5 | 6 | 7 |
|-----|-------------------------------------------------------------------------------------------------------------------------------------------------------|---|---|---|---|---|---|
| 168 | 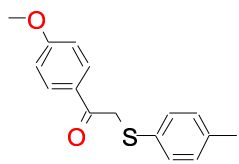 <p>Caco_2 12.09<br/>ID 7485479<br/>MDCK 185.30<br/>Score -50.73</p> |   |   |   |   |   |   |
